# Supplementary material for: Sortilin promotes glioblastoma invasion and mesenchymal transition through GSK-3β/β-catenin/twist pathway
Source: PubMed Central journal article supplement (PMC6393543; doi:10.1038/s41419-019-1449-9), 2019-02-27

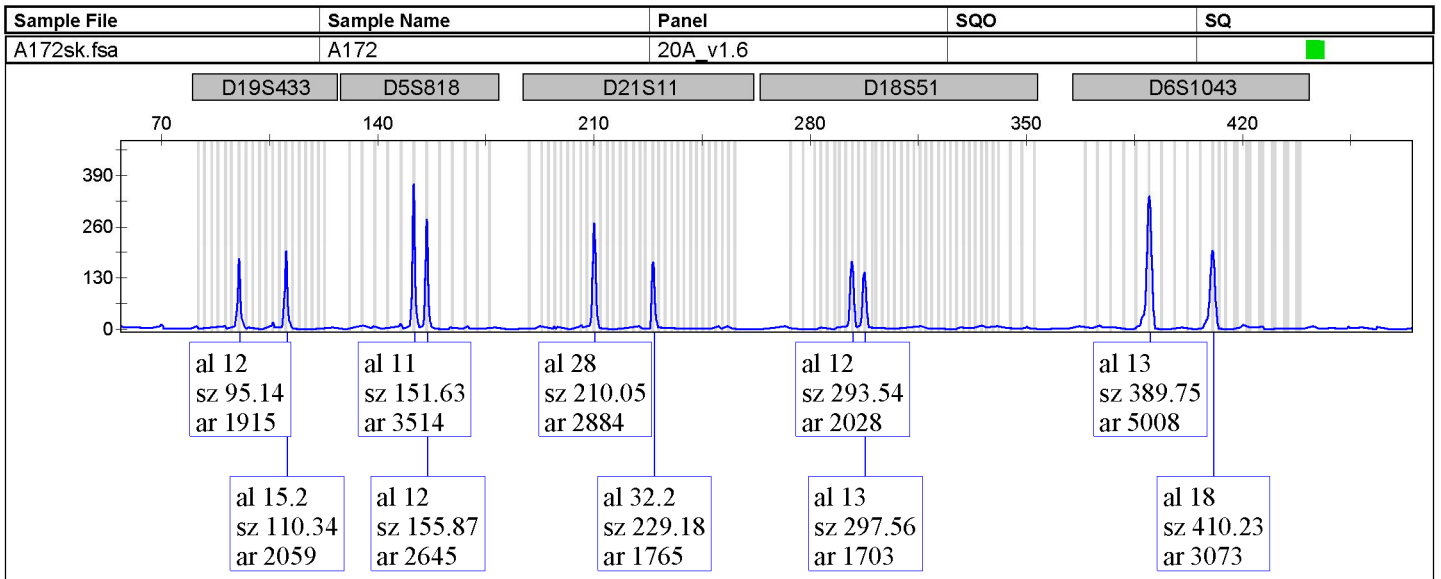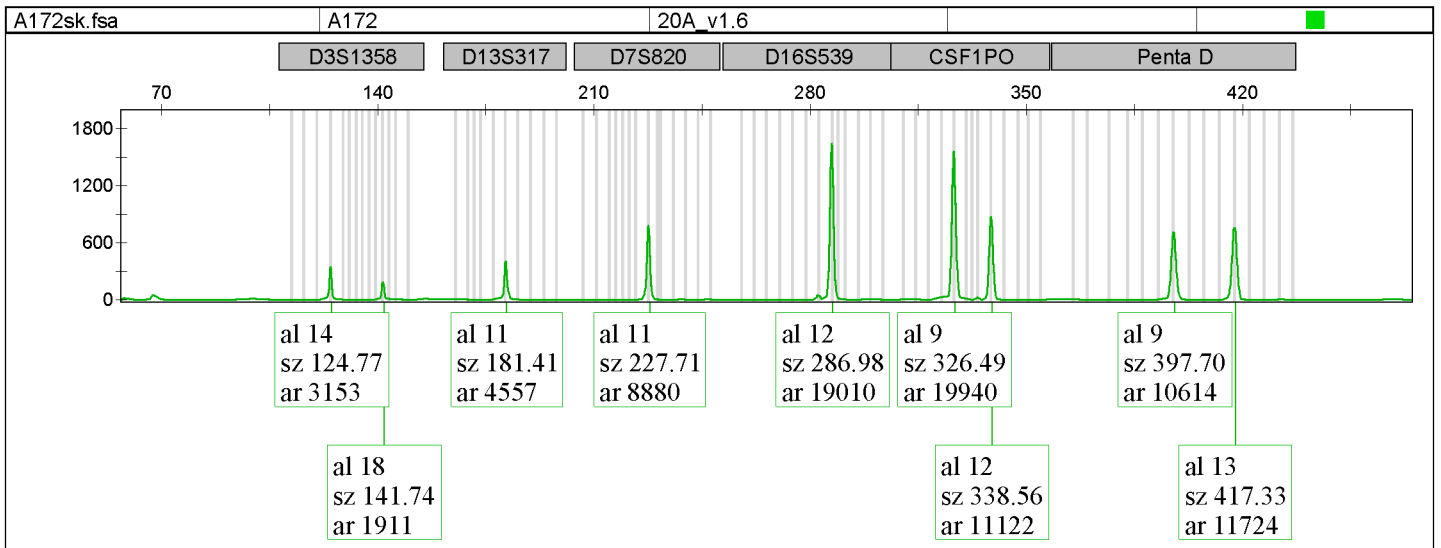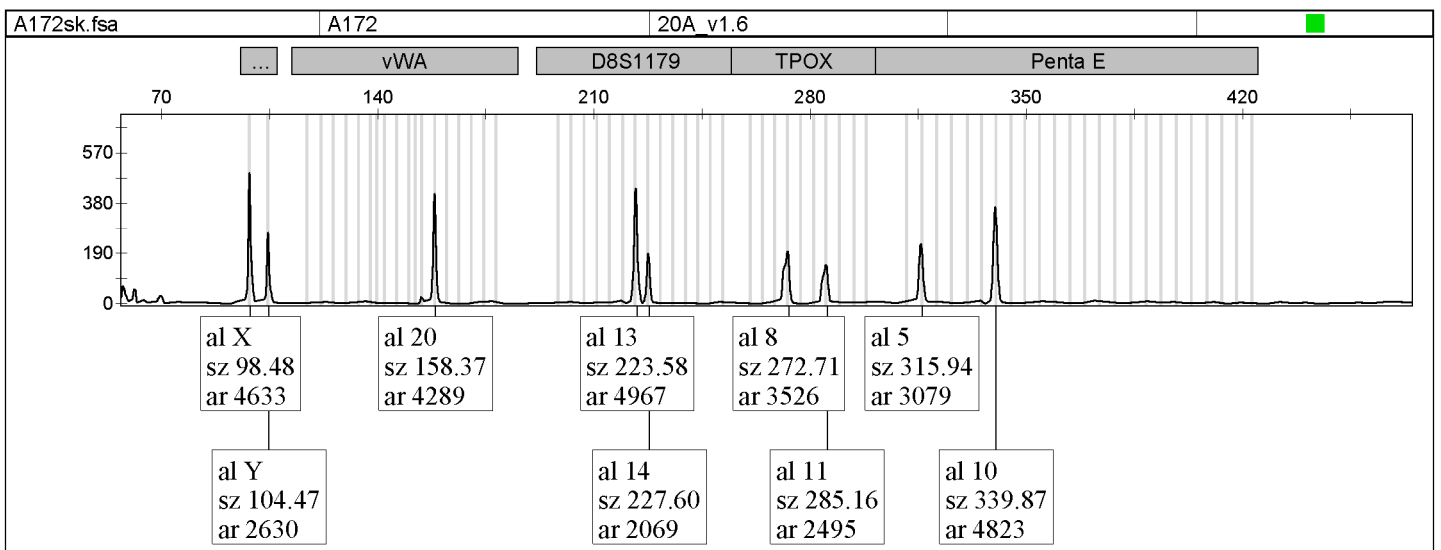

| Sample File | Sample Name | Panel    | SQO | SQ |
|-------------|-------------|----------|-----|----|
| A172sk.fsa  | A172        | 20A_v1.6 |     | ■  |

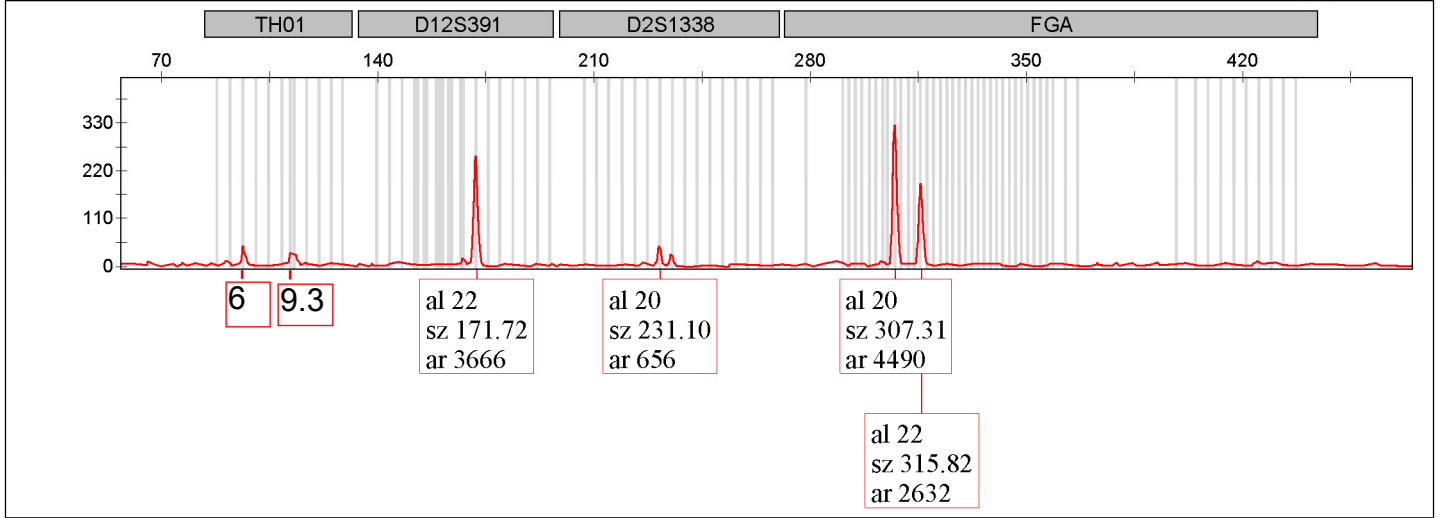

Supplement: 41419_2019_1449_MOESM4_ESM.pdf [file 41419_2019_1449_MOESM4_ESM.pdf]
