# Supplementary material for: Sortilin promotes glioblastoma invasion and mesenchymal transition through GSK-3β/β-catenin/twist pathway
Source: PubMed Central journal article supplement (PMC6393543; doi:10.1038/s41419-019-1449-9), 2019-02-27

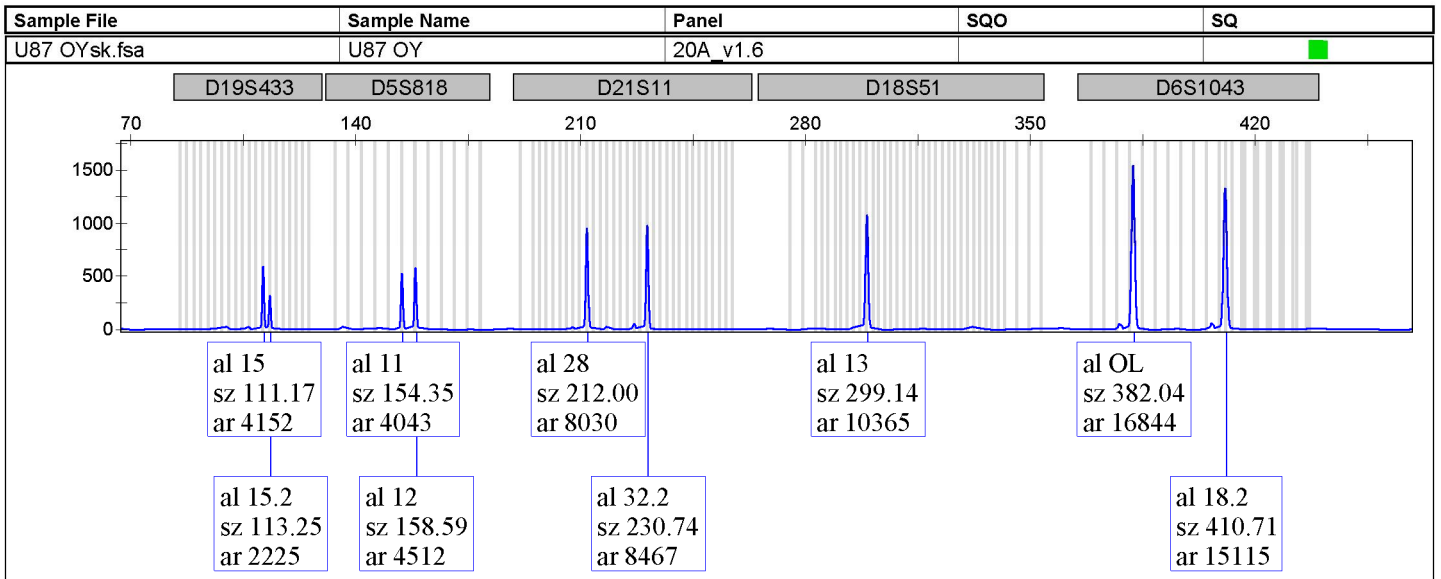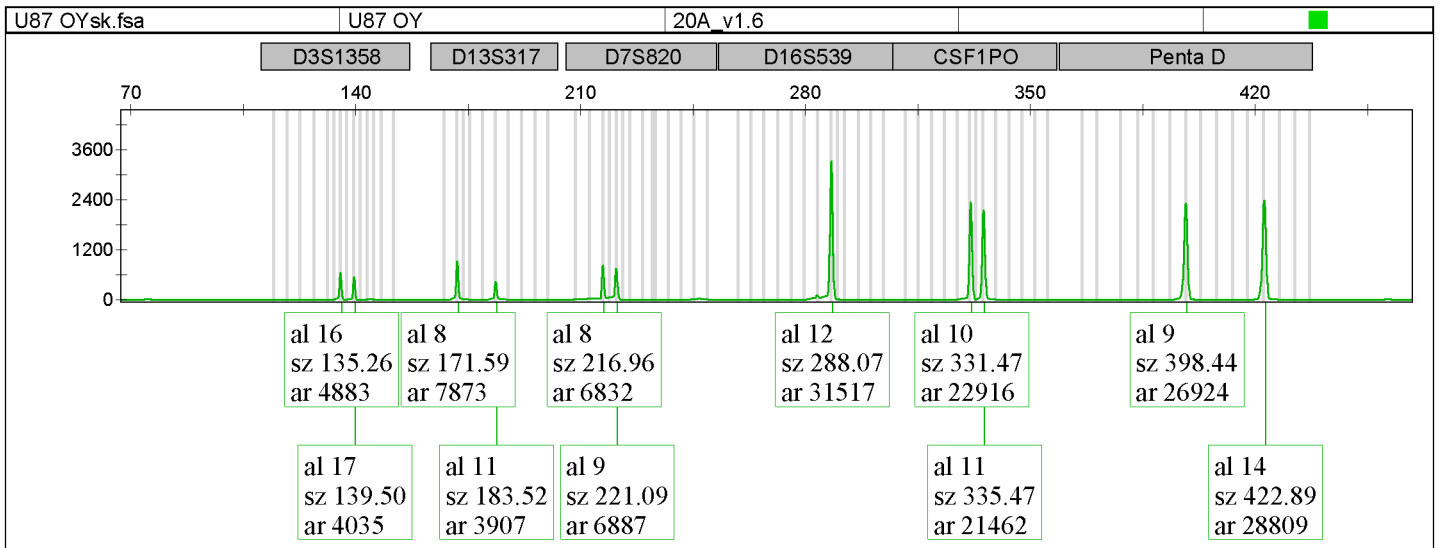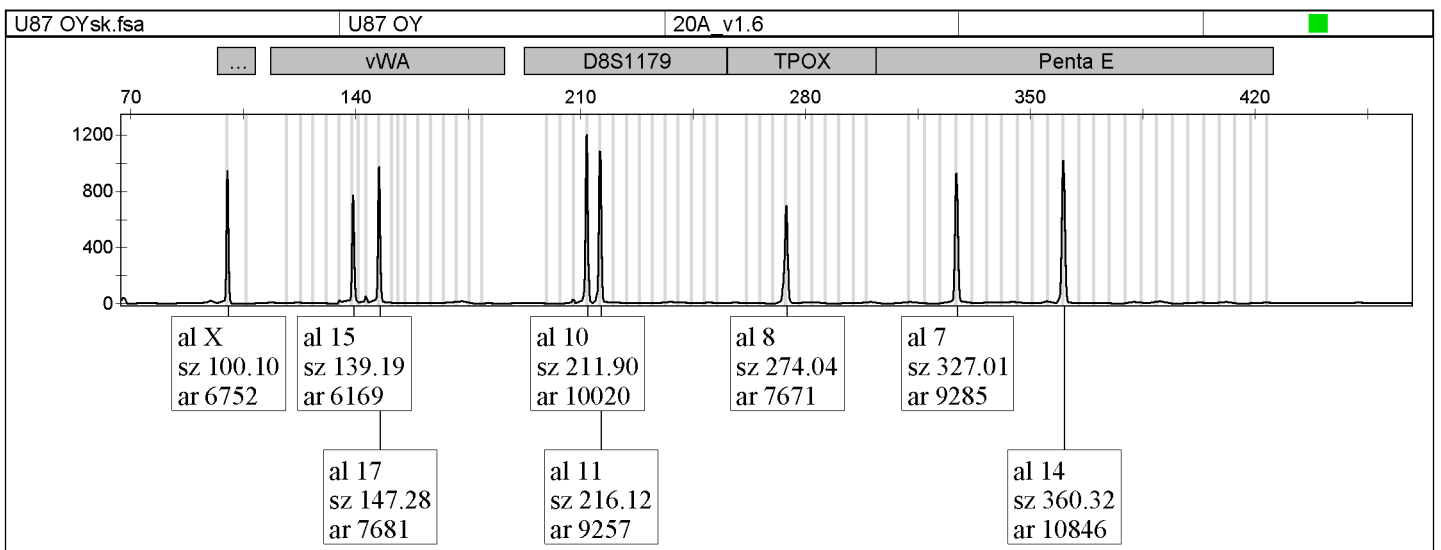

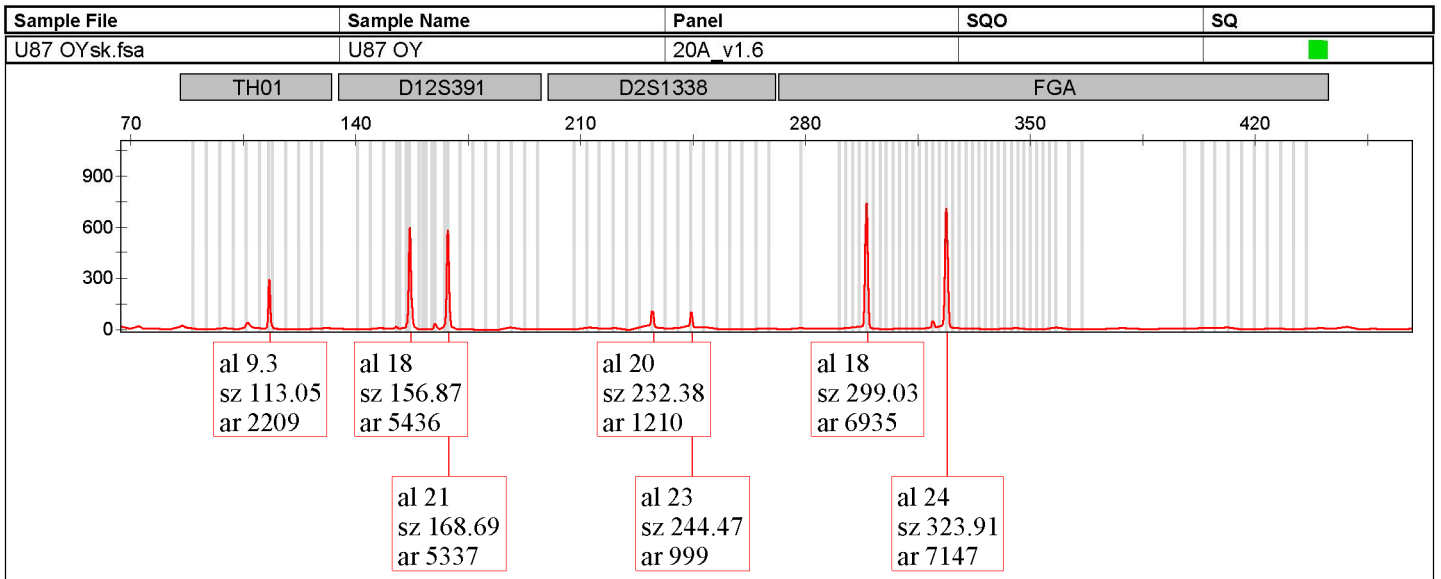

Supplement: 41419_2019_1449_MOESM5_ESM.pdf [file 41419_2019_1449_MOESM5_ESM.pdf]
